# Supplementary material for: Role of Mitochondria in Regulating Lutein and Chlorophyll Biosynthesis in Chlorella pyrenoidosa under Heterotrophic Conditions
Source: PubMed Central journal article supplement (PMC6213193; doi:10.3390/md16100354), 2018-09-28
Supplement: marinedrugs-16-00354-s001.pdf [file marinedrugs-16-00354-s001.pdf]

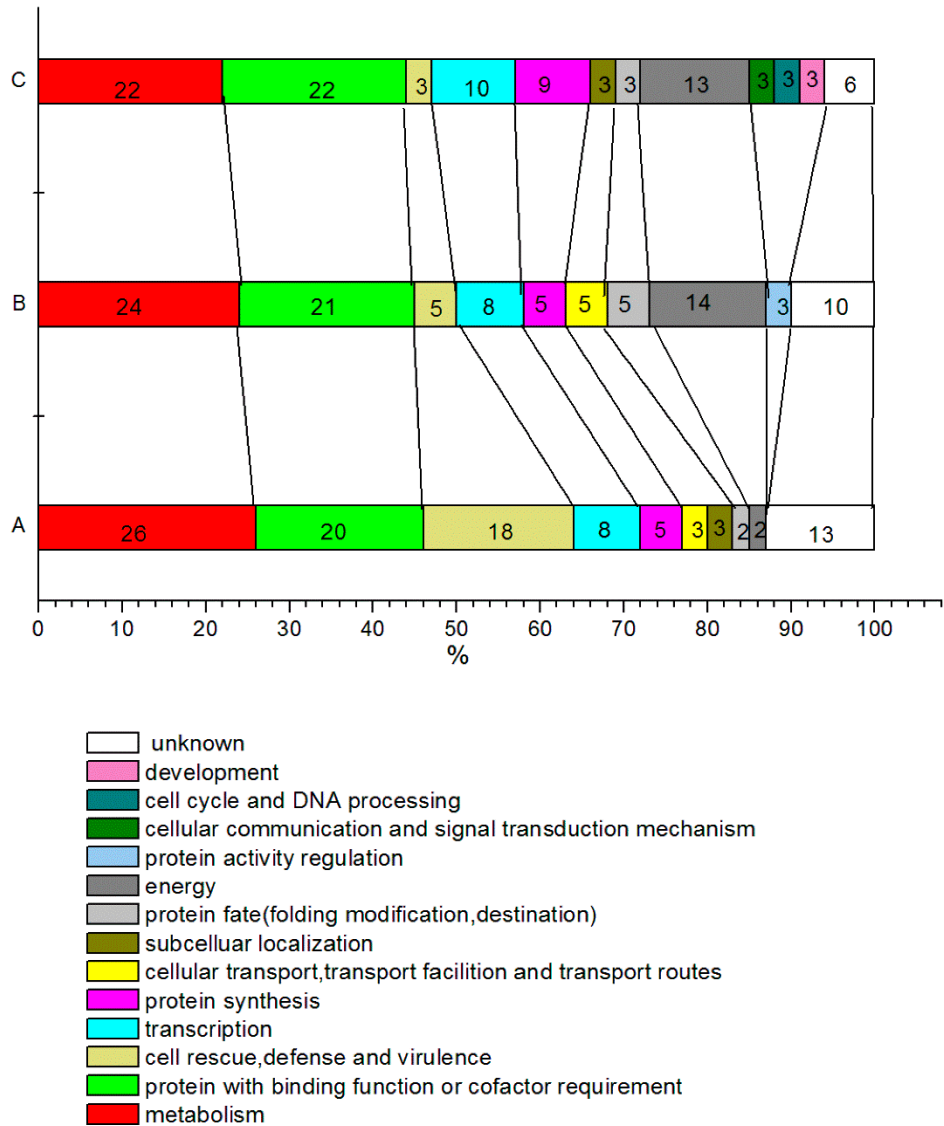

**Figure S1.** Functional categorization of identified up- and down-regulated proteins in *Chlorella pyrenoidosa* after treatment with mitochondrial respiratory electron transport chain (mRET) inhibitors. (A) Salicylhydroxamic acid (SHAM) treatment; (B) antimycin A treatment; (C) sodium azide (NaN<sub>3</sub>) treatment. This classification is based on homologies.
